# Supplementary material for: MicroRNA-199a acts as a potential suppressor of cardiomyocyte autophagy through targeting Hspa5
Source: Oncotarget. 2017 Jul 10;8(38):63825–34. doi: 10.18632/oncotarget.19133 (PMC5609964; doi:10.18632/oncotarget.19133)
Supplement: Supplementary file 1 [file oncotarget-08-63825-s001.pdf]

## MicroRNA-199a acts as a potential suppressor of cardiomyocyte autophagy through targeting *Hspa5*

### SUPPLEMENTARY MATERIALS

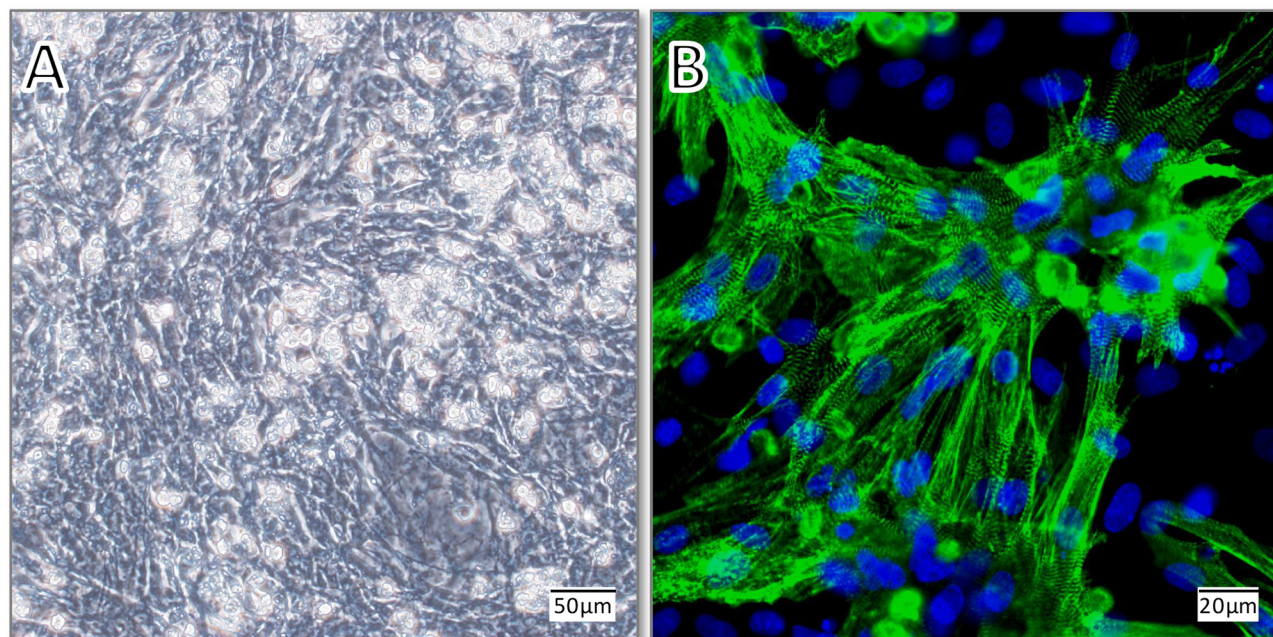

**Supplementary Figure 1: Primary cardiomyocytes isolated from neonatal Sprague-Dawley rats. (A)** Microscopy image of CMs on Day 3. **(B)** Immunofluorescence staining of CMs.  $\alpha$ -Actinin (green) indicates CMs. Nuclei were stained with DAPI (blue).

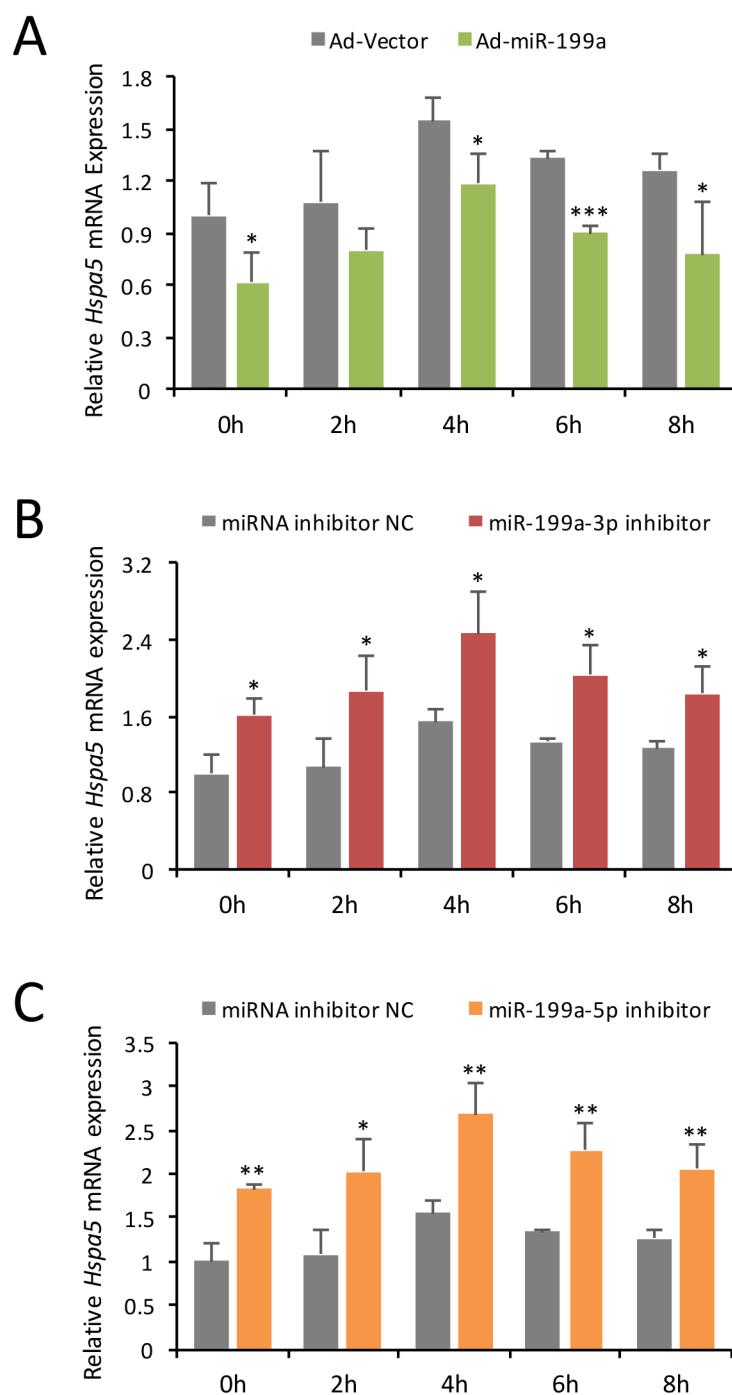

**Supplementary Figure 2: The *Hspa5* mRNA expressions after overexpression or knockdown of miR-199a.** (A) Forced overexpression of miR-199a in starved CMs significantly decreased the *Hspa5* expression levels compared with Ad-Vector group at each time point (\* $P < 0.05$ , \*\*\* $P < 0.001$ ,  $n = 3$ ). (B and C) Knockdown of either miR-199a-3p or miR-199a-5p in starved CMs markedly increased *Hspa5* expression levels compared with negative control (NC) at each time point (\* $P < 0.05$ , \*\* $P < 0.01$ ,  $n = 3$ ). The differences between two groups were analyzed using *t*-tests. *Gapdh* was used as reference.

Supplementary Table 1: Primers used in the amplification reaction

| Primers                   | 5'-3'                  |
|---------------------------|------------------------|
| rno-miR-199a-3p Forward   | CTGAGTACAGTAGTCTGCACAT |
| rno-miR-199a-5p Forward   | CTGAGTCCCAGTGTTTCAGACT |
| miRNAs common Reverse     | GTGCAGGGTCCGAGGT       |
| rno- <i>Hspa5</i> Forward | AACCCAGATGAGGCTGTAGCA  |
| rno- <i>Hspa5</i> Reverse | ACATCAAGCAGAACCAGGTCAC |
| rno- <i>Gapdh</i> Forward | GTCGGTGTCAACGGATTG     |
| rno- <i>Gapdh</i> Reverse | ACAAACATGGGGGCATCAG    |
| rno- <i>U6</i> Forward    | CTCGCTTCGGCAGCACA      |
| rno- <i>U6</i> Reverse    | AACGCTTCACGAATTTGCGT   |
